# Supplementary material for: Spin-coated ultrathin poly(vinylidene fluoride-co-trifluoroethylene) films for flexible and transparent electronics
Source: Royal Society of Chemistry journal article supplement (doi:10.1039/c0jm03533e), 2011-01-01
Supplement: c0jm03533e.pdf [file c0jm03533e.pdf]

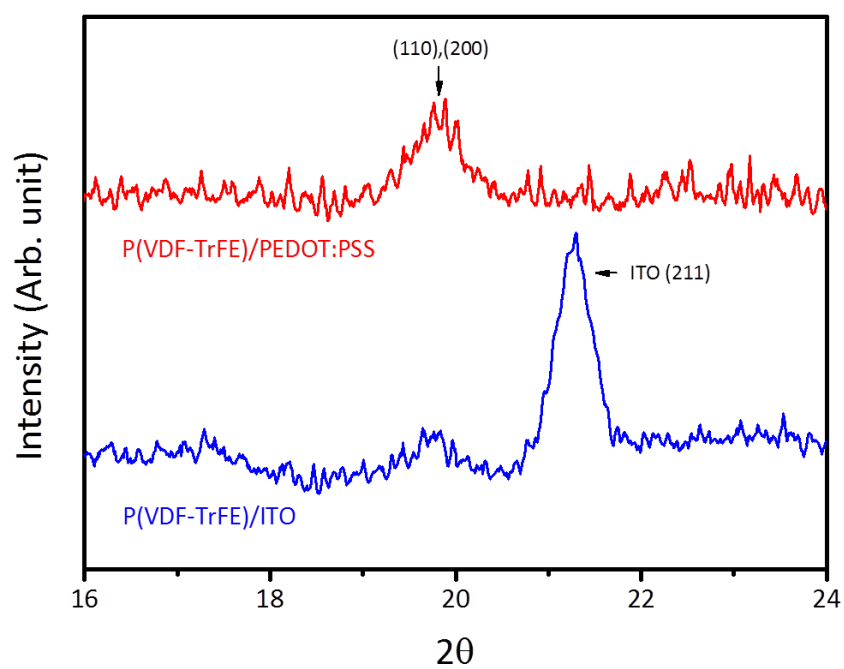

Figure S1. XRD patterns of P(VDF-TrFE) films on transparent and flexible substrates.

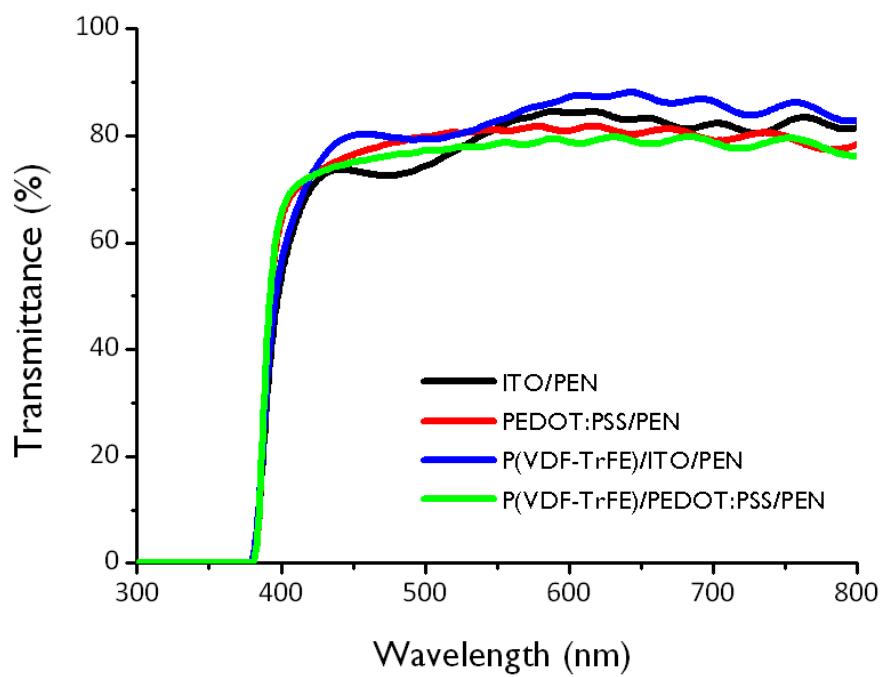

Figure S2. Transmittance of all flexible samples used in this study.

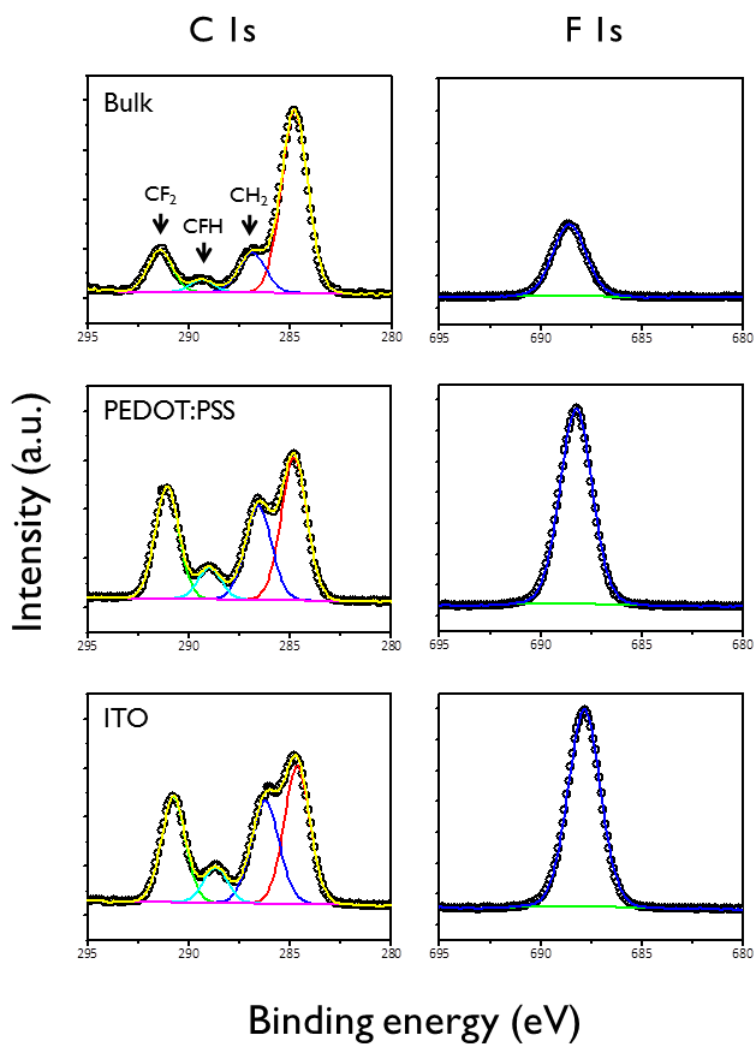

Figure S3. Fitting results of XPS spectra of all samples: (left) C 1s and (right) F 1s.
